# Supplementary material
Source: HighWire-hosted journal article supplement (https://bmjpaedsopen.bmj.com/content/8/1/e002467)
Supplement: inline-supplementary-material-1 [file inline-supplementary-material-1.pdf]

**Supplement 1: BSPGHAN EoE WG voting scores for each recommendation****Theme 1 - The BSPGHAN EoE working group recommends that STS are indicated in:**

| Statement to vote on                                                                                | Vote received (Score 1-9) |
|-----------------------------------------------------------------------------------------------------|---------------------------|
| Induction therapy                                                                                   | 9,8,9,9,8,9,9,9,8,9,9     |
| Maintenance therapy                                                                                 | 9,8,9,8,8,9,9,9,7,9,9     |
| First line treatment of EoE                                                                         | 9,6,7,8,8,9,9,6,9,8,9,3   |
| Combination therapy with proton pump inhibitors                                                     | 9,7,9,8,7,7,5,7,9,8,7,5   |
| Second line treatment after unsuccessful responses to dietary therapy and/or proton pump inhibition | 9,9,9,9,7,9,9,7,9,8,9,9   |
| Oesophageal stricture treatment in isolation or as an adjunct to oesophageal balloon dilatation     | 8,6,9,8,6,8,7,7,9,7,1,7   |

**Theme 2 - The BSPGHAN EoE working group recommends that:**

| Statement to vote on                                                                                                                                                                  | Vote received (Score 1-9) |
|---------------------------------------------------------------------------------------------------------------------------------------------------------------------------------------|---------------------------|
| The type of STS preparation offered should take into consideration the child's age, palatability, chance of adherence, comorbidities and family support                               | 9,9,9,8,8,9,9,9,9,9,9     |
| If a child is assessed to be able to tolerate and coordinate orodispersible budesonide (tablet) preparation and it is locally available, then this preparation should be first choice | 8,8,9,7,8,9,9,5,8,7,9,7   |

**Theme 3 - The BSPGHAN EoE working group recommends that:**

| Statement to vote on                                                                                                                                        | Vote received (Score 1-9) |
|-------------------------------------------------------------------------------------------------------------------------------------------------------------|---------------------------|
| Age should be used to determine STS dosing, unless a child significantly deviates from their growth centiles (in which case height should be accounted for) | 8,8,9,9,8,7,9,9,8,7,9,9   |

**Theme 4 - The BSPGHAN EoE working group recommends that:**

| Statement to vote on                                                                                                                                                   | Vote received (Score 1-9) |
|------------------------------------------------------------------------------------------------------------------------------------------------------------------------|---------------------------|
| Twice daily dosing is considered for induction therapy                                                                                                                 | 8,8,9,8,8,9,7,9,8,8,9,6   |
| For children < 10 years old, a dose of 0.5mg twice per day should be used (1mg/day), for children ≥ 10 years old, a dose of 1mg twice per day should be used (2mg/day) | 9,8,8,9,8,8,6,9,9,8,9,9   |
| Induction therapy should usually be given for a minimum of 3 months                                                                                                    | 9,8,9,8,8,7,9,9,9,8,9,9   |

**Theme 5 - The BSPGHAN EoE working group recommends that:**

| Statement to vote on                                                                                                           | Vote received (Score 1-9) |
|--------------------------------------------------------------------------------------------------------------------------------|---------------------------|
| After histological remission has been achieved, maintenance therapy should be considered for a minimum of 1-2 years            | 9,8,7,7,8,6,9,9,7,9,7     |
| For children < 10 years old, a dose of 0.5mg/day should be used, for children ≥ 10 years old, a dose of 1mg/day should be used | 9,8,7,7,8,6,6,9,9,7,9,8   |

**Theme 6 - The BSPGHAN EoE working group recommends that:**

| Statement to vote on                                                                                                              | Vote received (Score 1-9) |
|-----------------------------------------------------------------------------------------------------------------------------------|---------------------------|
| After confirmed histological remission and 3-month induction therapy, clinicians should consider halving the STS dose             | 9,8,8,8,7,7,7,8,8,8,9,9   |
| During maintenance therapy, dose weaning should be considered every 6-12 months                                                   | 8,8,7,7,7,6,7,8,8,8,4,7   |
| Oral or oesophageal candidiasis does not usually require stopping the STS; antifungal treatment should be added alongside the STS | 8,6,7,7,8,6,9,8,8,6,5,5   |

**Theme 7 -The BSPGHAN EoE working group recommends that endoscopy:**

| Statement to vote on                                                                                                                                     | Vote received (Score 1-9) |
|----------------------------------------------------------------------------------------------------------------------------------------------------------|---------------------------|
| Should be repeated during the induction period to ensure histological response to STS and allow weaning of the medication                                | 9,8,8,7,7,9,9,8,8,8,1,9   |
| Should be repeated if there is worsening of symptoms / oesophageal dysfunction                                                                           | 9,9,8,8,9,8,9,8,9,8,9,9   |
| Surveillance should be considered at 1-2 yearly intervals or if considering stopping treatment or following cessation of therapy if clinically indicated | 9,8,7,7,9,8,9,8,9,8,9,8   |
